# Supplementary material
Source: publisher figshare collection journal article supplement (https://acs.figshare.com/ndownloader/files/5069062)
Supplement: Supplementary file 1 [file 5069062]

data_global

#============================================================================

# 1. SUBMISSION DETAILS

_publ_contact_author          # Name and address of author for correspondence
;
      Hans Joachim Breunig
      Institut f\"ur Anorganische und Physikalische Chemie
      der Universit\"at
      Postfach 330 440
      28334 Bremen
      Bundesrepublik Deutschland
;
_publ_contact_author_phone        '049 421 2182266'
_publ_contact_author_fax          '049 421 2184267'
_publ_contact_author_email        breunig@chemie.uni-bremen.de

_publ_requested_journal           'Chem. Commun.
_publ_requested_coeditor_name     ?


#============================================================================

# 2. PROCESSING SUMMARY (IUCr Office Use Only)

_journal_date_recd_electronic     ?

_journal_date_to_coeditor         ?
_journal_date_from_coeditor       ?
_journal_date_accepted            ?

_journal_date_printers_first      ?
_journal_date_printers_final      ?
_journal_date_proofs_out          ?
_journal_date_proofs_in           ?

_journal_coeditor_name            ?
_journal_coeditor_code            ?
_journal_coeditor_notes
 ?

_journal_techeditor_code          ?
_journal_techeditor_notes
 ?

_journal_coden_ASTM               ?
_journal_name_full                ?
_journal_year                     ?
_journal_volume                   ?
_journal_issue                    ?
_journal_page_first               ?
_journal_page_last                ?

_journal_suppl_publ_number        ?
_journal_suppl_publ_pages         ?

#============================================================================

# 3. TITLE AND AUTHOR LIST

_publ_section_title
;
Isomers of a dibismuthane, R2Bi-BiR2 [R = 2,6-(Me2NCH2)2C6H3], and unusual
reactions with oxygen: formation of [R2Bi]2(O2) and R'R''Bi 
[R'= 2-(Me2NCH2)-6-{Me2N(O)CH2}C6H3; R'' = [2-(Me2NCH2)-6-{O(O)C}C6H3]
;

# The loop structure below should contain the names and addresses of all
# authors, in the required order of publication. Repeat as necessary.

loop_
 _publ_author_name
 _publ_author_address
     'Balasz, Lucia'
;     Institut f\"ur Anorganische und Physikalisch Chemie
      der Universit\"at
      Postfach 330 440
      28334 Bremen
      Bundesrepublik Deutschland
;
     'Breunig, Hans Joachim'
;     Institut f\"ur Anorganische und Physikalisch Chemie
      der Universit\"at
      Postfach 330 440
      28334 Bremen
      Bundesrepublik Deutschland
;
     'Lork, Enno'
;     Institut f\"ur Anorganische und Physikalisch Chemie
      der Universit\"at
      Postfach 330 440
      28334 Bremen
      Bundesrepublik Deutschland
;
     'Soran, Albert'
;     Universitatea "Babes-Bolyai" Cluj-Napoca
      Facultatea di Chimie si Inginerie Chimica
      RO-3400 Cluj-Napoca
      Romania
;     
     'Silvestru, Cristian'
;     Universitatea "Babes-Bolyai" Cluj-Napoca
      Facultatea di Chimie si Inginerie Chimica
      RO-3400 Cluj-Napoca
      Romania
;

#============================================================================
  
data_lb35 
  
_audit_creation_method            SHELXL-97 
_chemical_name_systematic 
; 
 ? 
; 
_chemical_name_common             ? 
_chemical_melting_point           ? 
_chemical_formula_moiety          'C48 H76 Bi2 N8 O2, C4 H10 O'
_chemical_formula_sum 
 'C52 H86 Bi2 N8 O3' 
_chemical_formula_weight          1289.25 
  
loop_ 
 _atom_type_symbol 
 _atom_type_description 
 _atom_type_scat_dispersion_real 
 _atom_type_scat_dispersion_imag 
 _atom_type_scat_source 
 'C'  'C'   0.0033   0.0016 
 'International Tables Vol C Tables 4.2.6.8 and 6.1.1.4' 
 'H'  'H'   0.0000   0.0000 
 'International Tables Vol C Tables 4.2.6.8 and 6.1.1.4' 
 'N'  'N'   0.0061   0.0033 
 'International Tables Vol C Tables 4.2.6.8 and 6.1.1.4' 
 'O'  'O'   0.0106   0.0060 
 'International Tables Vol C Tables 4.2.6.8 and 6.1.1.4' 
 'Bi'  'Bi'  -4.1077  10.2566 
 'International Tables Vol C Tables 4.2.6.8 and 6.1.1.4' 
  
_symmetry_cell_setting            Triclinic 
_symmetry_space_group_name_H-M    'P -1'
_symmetry_space_group_name_Hall   '-P 1'
  
loop_ 
 _symmetry_equiv_pos_as_xyz 
 'x, y, z' 
 '-x, -y, -z' 
  
_cell_length_a                    11.446(3) 
_cell_length_b                    12.012(5) 
_cell_length_c                    23.542(6) 
_cell_angle_alpha                 85.28(3) 
_cell_angle_beta                  77.770(10) 
_cell_angle_gamma                 62.15(2) 
_cell_volume                      2796.4(15) 
_cell_formula_units_Z             2 
_cell_measurement_temperature     173(2) 
_cell_measurement_reflns_used     38 
_cell_measurement_theta_min       3.526 
_cell_measurement_theta_max       12.544 
  
_exptl_crystal_description        blocks 
_exptl_crystal_colour             'light yellow' 
_exptl_crystal_size_max           0.70 
_exptl_crystal_size_mid           0.60 
_exptl_crystal_size_min           0.50 
_exptl_crystal_density_meas       ? 
_exptl_crystal_density_diffrn     1.531 
_exptl_crystal_density_method     'not measured' 
_exptl_crystal_F_000              1288 
_exptl_absorpt_coefficient_mu     6.330 
_exptl_absorpt_correction_type    refdelF 
_exptl_absorpt_correction_T_min   0.0954 
_exptl_absorpt_correction_T_max   0.1440 
_exptl_absorpt_process_details    'Stuart & Walker, Acta Cryst A (1983)'
  
_exptl_special_details 
; 
 ? 
; 
  
_diffrn_ambient_temperature       173(2) 
_diffrn_radiation_wavelength      0.71073 
_diffrn_radiation_type            MoK\a 
_diffrn_radiation_source          'normal-focus sealed tube' 
_diffrn_radiation_monochromator   graphite 
_diffrn_measurement_device_type   'Siemens P4'
_diffrn_measurement_method        '2\q/\w scans' 
_diffrn_detector_area_resol_mean  ? 
_diffrn_standards_number          3 
_diffrn_standards_interval_count  197 
_diffrn_standards_interval_time   ? 
_diffrn_standards_decay_%         'random variation +/-2.0' 
_diffrn_reflns_number             14805 
_diffrn_reflns_av_R_equivalents   0.0247 
_diffrn_reflns_av_sigmaI/netI     0.0537 
_diffrn_reflns_limit_h_min        -1
_diffrn_reflns_limit_h_max        14 
_diffrn_reflns_limit_k_min        -13 
_diffrn_reflns_limit_k_max        15 
_diffrn_reflns_limit_l_min        -30 
_diffrn_reflns_limit_l_max        30 
_diffrn_reflns_theta_min          2.59 
_diffrn_reflns_theta_max          27.50 
_reflns_number_total              12684 
_reflns_number_gt                 9658 
_reflns_threshold_expression      >2\s(I) 
  
_computing_data_collection        'Siemens XSCANS' 
_computing_cell_refinement        'Siemens XSCANS' 
_computing_data_reduction         'Siemens XSCANS' 
_computing_structure_solution     'SHELXS-97 (Sheldrick, 1990)' 
_computing_structure_refinement   'SHELXL-97 (Sheldrick, 1997)' 
_computing_molecular_graphics     'Diamond, Crystal Impact' 
_computing_publication_material   'Siemens SHELXTL' 
  
_refine_special_details 
; 
 Refinement of F^2^ against ALL reflections.  The weighted R-factor wR and 
 goodness of fit S are based on F^2^, conventional R-factors R are based 
 on F, with F set to zero for negative F^2^. The threshold expression of 
 F^2^ > 2sigma(F^2^) is used only for calculating R-factors(gt) etc. and is 
 not relevant to the choice of reflections for refinement.  R-factors based 
 on F^2^ are statistically about twice as large as those based on F, and R- 
 factors based on ALL data will be even larger. 
; 
  
_refine_ls_structure_factor_coef  Fsqd 
_refine_ls_matrix_type            full 
_refine_ls_weighting_scheme       calc 
_refine_ls_weighting_details 
 'calc w=1/[\s^2^(Fo^2^)+(0.0501P)^2^+10.1571P] where P=(Fo^2^+2Fc^2^)/3' 
_atom_sites_solution_primary      direct 
_atom_sites_solution_secondary    difmap 
_atom_sites_solution_hydrogens    geom 
_refine_ls_hydrogen_treatment     refU
_refine_ls_extinction_method      none 
_refine_ls_extinction_coef        ? 
_refine_ls_number_reflns          12684 
_refine_ls_number_parameters      627 
_refine_ls_number_restraints      0 
_refine_ls_R_factor_all           0.0669 
_refine_ls_R_factor_gt            0.0439 
_refine_ls_wR_factor_ref          0.1113 
_refine_ls_wR_factor_gt           0.1004 
_refine_ls_goodness_of_fit_ref    1.016 
_refine_ls_restrained_S_all       1.016 
_refine_ls_shift/su_max           0.004 
_refine_ls_shift/su_mean          0.000 
  
loop_ 
 _atom_site_label 
 _atom_site_type_symbol 
 _atom_site_fract_x 
 _atom_site_fract_y 
 _atom_site_fract_z 
 _atom_site_U_iso_or_equiv 
 _atom_site_adp_type 
 _atom_site_occupancy 
 _atom_site_symmetry_multiplicity 
 _atom_site_calc_flag 
 _atom_site_refinement_flags 
 _atom_site_disorder_assembly 
 _atom_site_disorder_group 
Bi1 Bi 0.20219(2) 0.53080(2) 0.381051(9) 0.02903(7) Uani 1 1 d . . . 
Bi2 Bi 0.24038(2) 0.46539(2) 0.183268(10) 0.03416(8) Uani 1 1 d . . . 
O1 O 0.2216(5) 0.5530(4) 0.28904(19) 0.0402(11) Uani 1 1 d . . . 
O2 O 0.2809(5) 0.4165(4) 0.2703(2) 0.0443(12) Uani 1 1 d . . . 
N1 N -0.0798(7) 0.7266(7) 0.3535(3) 0.0563(18) Uani 1 1 d . . . 
N2 N 0.2291(6) 0.5779(6) 0.4941(2) 0.0461(15) Uani 1 1 d . . . 
N3A N 0.4696(16) 0.1308(13) 0.4107(6) 0.047(4) Uani 0.438(12) 1 d P A 1 
N3B N 0.3610(11) 0.2107(10) 0.3886(5) 0.040(3) Uani 0.562(12) 1 d P A 2 
N4 N 0.5256(6) 0.6915(5) 0.3018(3) 0.0408(13) Uani 1 1 d . . . 
N7 N 0.2557(6) 0.8375(5) 0.1423(3) 0.0459(15) Uani 1 1 d . . . 
N8 N 0.7153(7) 0.1750(6) 0.1823(3) 0.0500(16) Uani 1 1 d . . . 
N5 N 0.1056(7) 0.3055(7) 0.2443(3) 0.0499(16) Uani 1 1 d . . . 
N6 N 0.2813(6) 0.4609(5) 0.0597(2) 0.0386(13) Uani 1 1 d . . . 
C1 C 0.1406(7) 0.7382(6) 0.3958(3) 0.0370(15) Uani 1 1 d . . . 
C2 C 0.0524(8) 0.8312(6) 0.3636(3) 0.0470(19) Uani 1 1 d . . . 
C3 C 0.0192(10) 0.9571(8) 0.3730(4) 0.065(3) Uani 1 1 d . . . 
H3 H -0.0403 1.0207 0.3514 0.054(7) Uiso 1 1 calc R . . 
C4 C 0.0690(11) 0.9908(8) 0.4116(5) 0.076(3) Uani 1 1 d . . . 
H4 H 0.0506 1.0760 0.4147 0.054(7) Uiso 1 1 calc R . . 
C5 C 0.1473(10) 0.9007(8) 0.4469(4) 0.066(3) Uani 1 1 d . . . 
H5 H 0.1749 0.9254 0.4769 0.054(7) Uiso 1 1 calc R . . 
C6 C 0.1859(8) 0.7722(7) 0.4381(3) 0.0433(16) Uani 1 1 d . . . 
C7 C -0.0150(8) 0.8020(8) 0.3242(3) 0.059(2) Uani 1 1 d . . . 
H7A H -0.0837 0.8815 0.3110 0.082(7) Uiso 1 1 calc R . . 
H7B H 0.0522 0.7551 0.2895 0.082(7) Uiso 1 1 calc R . . 
C8 C -0.1286(10) 0.6828(11) 0.3128(5) 0.082(3) Uani 1 1 d . . . 
H8A H -0.1931 0.7552 0.2945 0.081(4) Uiso 1 1 calc R . . 
H8B H -0.1731 0.6343 0.3335 0.081(4) Uiso 1 1 calc R . . 
H8C H -0.0526 0.6291 0.2828 0.081(4) Uiso 1 1 calc R . . 
C9 C -0.1883(9) 0.7999(10) 0.4006(4) 0.072(3) Uani 1 1 d . . . 
H9A H -0.2543 0.8763 0.3851 0.081(4) Uiso 1 1 calc R . . 
H9B H -0.1516 0.8233 0.4289 0.081(4) Uiso 1 1 calc R . . 
H9C H -0.2322 0.7497 0.4196 0.081(4) Uiso 1 1 calc R . . 
C10 C 0.2734(9) 0.6748(8) 0.4750(3) 0.0515(19) Uani 1 1 d . . . 
H10A H 0.3672 0.6335 0.4528 0.082(7) Uiso 1 1 calc R . . 
H10B H 0.2727 0.7167 0.5097 0.082(7) Uiso 1 1 calc R . . 
C11 C 0.3253(10) 0.4828(9) 0.5262(3) 0.063(2) Uani 1 1 d . . . 
H11A H 0.4137 0.4411 0.5004 0.081(4) Uiso 1 1 calc R . . 
H11B H 0.2945 0.4203 0.5408 0.081(4) Uiso 1 1 calc R . . 
H11C H 0.3324 0.5230 0.5590 0.081(4) Uiso 1 1 calc R . . 
C12 C 0.0952(9) 0.6317(8) 0.5303(3) 0.059(2) Uani 1 1 d . . . 
H12A H 0.0946 0.6734 0.5645 0.081(4) Uiso 1 1 calc R . . 
H12B H 0.0700 0.5647 0.5428 0.081(4) Uiso 1 1 calc R . . 
H12C H 0.0305 0.6934 0.5080 0.081(4) Uiso 1 1 calc R . . 
C13 C 0.4322(6) 0.4433(5) 0.3675(3) 0.0294(12) Uani 1 1 d . . . 
C14 C 0.4986(7) 0.3208(6) 0.3893(3) 0.0341(14) Uani 1 1 d . A . 
C15 C 0.6383(7) 0.2541(6) 0.3766(3) 0.0406(16) Uani 1 1 d . . . 
H15 H 0.6823 0.1722 0.3917 0.054(7) Uiso 1 1 calc R . . 
C16 C 0.7139(7) 0.3054(7) 0.3422(4) 0.0453(17) Uani 1 1 d . . . 
H16 H 0.8094 0.2592 0.3337 0.054(7) Uiso 1 1 calc R . . 
C17 C 0.6496(6) 0.4249(6) 0.3202(3) 0.0373(15) Uani 1 1 d . . . 
H17 H 0.7019 0.4596 0.2963 0.054(7) Uiso 1 1 calc R . . 
C18 C 0.5112(6) 0.4942(5) 0.3325(3) 0.0304(13) Uani 1 1 d . . . 
C19 C 0.4500(7) 0.6203(6) 0.3033(3) 0.0334(14) Uani 1 1 d . . . 
H19A H 0.4464 0.6061 0.2630 0.082(7) Uiso 1 1 calc R . . 
H19B H 0.3563 0.6711 0.3243 0.082(7) Uiso 1 1 calc R . . 
C20 C 0.4750(10) 0.8000(8) 0.2645(4) 0.058(2) Uani 1 1 d . . . 
H20A H 0.4871 0.7710 0.2250 0.081(4) Uiso 1 1 calc R . . 
H20B H 0.5250 0.8479 0.2638 0.081(4) Uiso 1 1 calc R . . 
H20C H 0.3790 0.8539 0.2796 0.081(4) Uiso 1 1 calc R . . 
C21 C 0.5134(9) 0.7357(8) 0.3592(3) 0.0514(19) Uani 1 1 d . . . 
H21A H 0.4182 0.7903 0.3755 0.081(4) Uiso 1 1 calc R . . 
H21B H 0.5644 0.7832 0.3565 0.081(4) Uiso 1 1 calc R . . 
H21C H 0.5492 0.6634 0.3845 0.081(4) Uiso 1 1 calc R . . 
C22 C 0.4243(8) 0.2553(6) 0.4280(3) 0.0456(18) Uani 1 1 d . . . 
H22A H 0.4358 0.2560 0.4685 0.082(7) Uiso 1 1 calc R A 1 
H22B H 0.3269 0.3038 0.4277 0.082(7) Uiso 1 1 calc R A 1 
C23 C 0.4419(14) 0.1231(10) 0.3530(5) 0.084(4) Uani 1 1 d . A 1 
H23A H 0.3561 0.1952 0.3485 0.081(4) Uiso 1 1 calc R A 1 
H23B H 0.4369 0.0448 0.3496 0.081(4) Uiso 1 1 calc R A 1 
H23C H 0.5145 0.1243 0.3226 0.081(4) Uiso 1 1 calc R A 1 
C24A C 0.420(3) 0.0600(18) 0.4539(9) 0.069(7) Uani 0.438(12) 1 d P A 1 
H24A H 0.3232 0.1104 0.4679 0.081(4) Uiso 0.438(12) 1 calc PR A 1 
H24B H 0.4670 0.0407 0.4866 0.081(4) Uiso 0.438(12) 1 calc PR A 1 
H24C H 0.4379 -0.0187 0.4361 0.081(4) Uiso 0.438(12) 1 calc PR A 1 
C24B C 0.2746(17) 0.1625(17) 0.4274(9) 0.074(6) Uani 0.562(12) 1 d P A 2 
H24D H 0.3302 0.0913 0.4494 0.081(4) Uiso 0.562(12) 1 calc PR A 2 
H24E H 0.2314 0.1347 0.4040 0.081(4) Uiso 0.562(12) 1 calc PR A 2 
H24F H 0.2052 0.2297 0.4546 0.081(4) Uiso 0.562(12) 1 calc PR A 2 
C25 C 0.3323(6) 0.2668(6) 0.1460(3) 0.0320(13) Uani 1 1 d . . . 
C26 C 0.3953(7) 0.2411(6) 0.0880(3) 0.0344(14) Uani 1 1 d . . . 
C27 C 0.4512(8) 0.1196(7) 0.0649(3) 0.0445(17) Uani 1 1 d . . . 
H27 H 0.4969 0.1023 0.0255 0.054(7) Uiso 1 1 calc R . . 
C28 C 0.4405(9) 0.0254(7) 0.0986(4) 0.0515(19) Uani 1 1 d . . . 
H28 H 0.4790 -0.0570 0.0825 0.054(7) Uiso 1 1 calc R . . 
C29 C 0.3743(8) 0.0495(7) 0.1557(3) 0.0470(18) Uani 1 1 d . . . 
H29 H 0.3685 -0.0169 0.1790 0.054(7) Uiso 1 1 calc R . . 
C30 C 0.3162(7) 0.1698(7) 0.1796(3) 0.0387(15) Uani 1 1 d . . . 
C31 C 0.2374(8) 0.1979(8) 0.2411(3) 0.0466(18) Uani 1 1 d . . . 
H31A H 0.2268 0.1233 0.2567 0.082(7) Uiso 1 1 calc R . . 
H31B H 0.2882 0.2148 0.2655 0.082(7) Uiso 1 1 calc R . . 
C32 C 0.0419(10) 0.3344(10) 0.3061(3) 0.066(3) Uani 1 1 d . . . 
H32A H 0.0359 0.2605 0.3245 0.081(4) Uiso 1 1 calc R . . 
H32B H -0.0489 0.4053 0.3095 0.081(4) Uiso 1 1 calc R . . 
H32C H 0.0961 0.3565 0.3256 0.081(4) Uiso 1 1 calc R . . 
C33 C 0.0209(9) 0.2851(11) 0.2133(4) 0.069(3) Uani 1 1 d . . . 
H33A H 0.0623 0.2712 0.1719 0.081(4) Uiso 1 1 calc R . . 
H33B H -0.0679 0.3593 0.2182 0.081(4) Uiso 1 1 calc R . . 
H33C H 0.0107 0.2112 0.2287 0.081(4) Uiso 1 1 calc R . . 
C34 C 0.4068(8) 0.3444(6) 0.0499(3) 0.0420(16) Uani 1 1 d . . . 
H34A H 0.4799 0.3588 0.0582 0.082(7) Uiso 1 1 calc R . . 
H34B H 0.4304 0.3178 0.0086 0.082(7) Uiso 1 1 calc R . . 
C35 C 0.3035(10) 0.5592(7) 0.0238(4) 0.059(2) Uani 1 1 d . . . 
H35A H 0.3236 0.5367 -0.0175 0.081(4) Uiso 1 1 calc R . . 
H35B H 0.3795 0.5656 0.0333 0.081(4) Uiso 1 1 calc R . . 
H35C H 0.2221 0.6404 0.0318 0.081(4) Uiso 1 1 calc R . . 
C36 C 0.1702(8) 0.4490(7) 0.0447(4) 0.0501(19) Uani 1 1 d . . . 
H36A H 0.0867 0.5278 0.0547 0.081(4) Uiso 1 1 calc R . . 
H36B H 0.1600 0.3798 0.0664 0.081(4) Uiso 1 1 calc R . . 
H36C H 0.1893 0.4315 0.0029 0.081(4) Uiso 1 1 calc R . . 
C37 C 0.4316(7) 0.4922(6) 0.1621(3) 0.0333(13) Uani 1 1 d . . . 
C38 C 0.5574(7) 0.4000(6) 0.1716(3) 0.0375(15) Uani 1 1 d . . . 
C39 C 0.6659(8) 0.4271(7) 0.1583(4) 0.0484(18) Uani 1 1 d . . . 
H39 H 0.7519 0.3648 0.1643 0.054(7) Uiso 1 1 calc R . . 
C40 C 0.6512(8) 0.5411(8) 0.1369(4) 0.0524(19) Uani 1 1 d . . . 
H40 H 0.7274 0.5562 0.1263 0.054(7) Uiso 1 1 calc R . . 
C41 C 0.5267(9) 0.6333(8) 0.1308(4) 0.053(2) Uani 1 1 d . . . 
H41 H 0.5159 0.7137 0.1174 0.054(7) Uiso 1 1 calc R . . 
C42 C 0.4156(8) 0.6106(7) 0.1439(4) 0.0475(18) Uani 1 1 d . . . 
C43 C 0.5788(7) 0.2775(6) 0.2016(3) 0.0403(16) Uani 1 1 d . . . 
H43A H 0.5623 0.2905 0.2441 0.082(7) Uiso 1 1 calc R . . 
H43B H 0.5124 0.2528 0.1936 0.082(7) Uiso 1 1 calc R . . 
C44 C 0.7288(9) 0.1341(8) 0.1238(4) 0.064(2) Uani 1 1 d . . . 
H44A H 0.6687 0.0967 0.1243 0.081(4) Uiso 1 1 calc R . . 
H44B H 0.8223 0.0714 0.1095 0.081(4) Uiso 1 1 calc R . . 
H44C H 0.7047 0.2067 0.0981 0.081(4) Uiso 1 1 calc R . . 
C45 C 0.7365(10) 0.0700(8) 0.2223(4) 0.072(3) Uani 1 1 d . . . 
H45A H 0.7316 0.0968 0.2613 0.081(4) Uiso 1 1 calc R . . 
H45B H 0.8254 -0.0010 0.2087 0.081(4) Uiso 1 1 calc R . . 
H45C H 0.6666 0.0439 0.2236 0.081(4) Uiso 1 1 calc R . . 
C46 C 0.2784(14) 0.7177(9) 0.1456(9) 0.157(9) Uani 1 1 d . . . 
H46A H 0.2435 0.7028 0.1135 0.082(7) Uiso 1 1 calc R . . 
H46B H 0.2210 0.7109 0.1823 0.082(7) Uiso 1 1 calc R . . 
C47 C 0.2608(14) 0.8593(13) 0.0776(6) 0.107(4) Uani 1 1 d . . . 
H47A H 0.1790 0.8658 0.0676 0.081(4) Uiso 1 1 calc R . . 
H47B H 0.3399 0.7887 0.0558 0.081(4) Uiso 1 1 calc R . . 
H47C H 0.2667 0.9376 0.0676 0.081(4) Uiso 1 1 calc R . . 
C48 C 0.1364(14) 0.9399(12) 0.1590(11) 0.232(15) Uani 1 1 d . . . 
H48A H 0.1067 0.9886 0.1247 0.081(4) Uiso 1 1 calc R . . 
H48B H 0.1463 0.9921 0.1856 0.081(4) Uiso 1 1 calc R . . 
H48C H 0.0694 0.9133 0.1788 0.081(4) Uiso 1 1 calc R . . 
O1S O -0.0909(9) 0.7660(7) 0.0595(4) 0.097(3) Uani 1 1 d . . . 
C1S C -0.1998(12) 0.7835(10) 0.1040(6) 0.083(3) Uani 1 1 d . . . 
H1S1 H -0.2536 0.7480 0.0920 0.082(7) Uiso 1 1 calc R . . 
H1S2 H -0.2586 0.8746 0.1123 0.082(7) Uiso 1 1 calc R . . 
C2S C -0.1507(12) 0.7213(12) 0.1558(5) 0.093(4) Uani 1 1 d . . . 
H2S1 H -0.0888 0.6321 0.1467 0.081(4) Uiso 1 1 calc R . . 
H2S2 H -0.2270 0.7289 0.1864 0.081(4) Uiso 1 1 calc R . . 
H2S3 H -0.1032 0.7610 0.1691 0.081(4) Uiso 1 1 calc R . . 
C3S C -0.1301(15) 0.8291(11) 0.0076(6) 0.103(4) Uani 1 1 d . . . 
H3S1 H -0.1730 0.9213 0.0143 0.082(7) Uiso 1 1 calc R . . 
H3S2 H -0.1967 0.8081 -0.0031 0.082(7) Uiso 1 1 calc R . . 
C4S C -0.0150(17) 0.7920(16) -0.0386(7) 0.142(7) Uani 1 1 d . . . 
H4S1 H 0.0493 0.8156 -0.0284 0.081(4) Uiso 1 1 calc R . . 
H4S2 H -0.0432 0.8343 -0.0743 0.081(4) Uiso 1 1 calc R . . 
H4S3 H 0.0280 0.7005 -0.0447 0.081(4) Uiso 1 1 calc R . . 
  
loop_ 
 _atom_site_aniso_label 
 _atom_site_aniso_U_11 
 _atom_site_aniso_U_22 
 _atom_site_aniso_U_33 
 _atom_site_aniso_U_23 
 _atom_site_aniso_U_13 
 _atom_site_aniso_U_12 
Bi1 0.02923(13) 0.02846(12) 0.03015(12) 0.00307(8) -0.00490(9) -0.01470(10) 
Bi2 0.03244(14) 0.03446(14) 0.03334(13) -0.00327(10) -0.00697(10) -0.01279(11) 
O1 0.046(3) 0.037(2) 0.034(2) -0.0028(19) -0.002(2) -0.018(2) 
O2 0.053(3) 0.038(3) 0.037(2) -0.002(2) -0.012(2) -0.015(2) 
N1 0.040(4) 0.069(5) 0.051(4) 0.004(3) -0.011(3) -0.018(3) 
N2 0.048(4) 0.053(4) 0.032(3) -0.004(3) -0.009(3) -0.019(3) 
N3A 0.062(10) 0.034(7) 0.041(7) 0.008(6) -0.002(7) -0.023(7) 
N3B 0.040(6) 0.038(6) 0.044(6) 0.003(4) -0.001(5) -0.022(5) 
N4 0.050(4) 0.033(3) 0.045(3) 0.005(2) -0.005(3) -0.026(3) 
N7 0.048(4) 0.031(3) 0.058(4) 0.004(3) -0.009(3) -0.019(3) 
N8 0.046(4) 0.034(3) 0.060(4) 0.004(3) -0.018(3) -0.008(3) 
N5 0.052(4) 0.072(4) 0.036(3) -0.008(3) 0.002(3) -0.039(4) 
N6 0.057(4) 0.031(3) 0.037(3) 0.007(2) -0.007(3) -0.030(3) 
C1 0.039(4) 0.028(3) 0.036(3) 0.000(2) 0.002(3) -0.013(3) 
C2 0.042(4) 0.030(3) 0.046(4) 0.007(3) 0.008(3) -0.007(3) 
C3 0.065(6) 0.033(4) 0.069(6) 0.011(4) 0.001(5) -0.006(4) 
C4 0.085(7) 0.028(4) 0.093(8) -0.007(4) 0.015(6) -0.019(5) 
C5 0.085(7) 0.050(5) 0.061(5) -0.026(4) 0.014(5) -0.037(5) 
C6 0.046(4) 0.040(4) 0.044(4) -0.004(3) 0.001(3) -0.023(3) 
C7 0.048(5) 0.051(5) 0.046(4) 0.015(3) -0.013(4) 0.003(4) 
C8 0.056(6) 0.106(9) 0.075(7) -0.019(6) -0.017(5) -0.025(6) 
C9 0.045(5) 0.091(7) 0.072(6) -0.009(5) -0.004(4) -0.027(5) 
C10 0.058(5) 0.062(5) 0.045(4) -0.007(4) -0.010(4) -0.036(4) 
C11 0.091(7) 0.064(5) 0.038(4) 0.007(4) -0.026(4) -0.034(5) 
C12 0.068(6) 0.063(5) 0.033(4) 0.003(3) 0.004(4) -0.026(5) 
C13 0.032(3) 0.026(3) 0.033(3) 0.001(2) -0.004(2) -0.016(3) 
C14 0.033(3) 0.031(3) 0.039(3) 0.006(3) -0.009(3) -0.015(3) 
C15 0.036(4) 0.027(3) 0.057(4) 0.007(3) -0.016(3) -0.010(3) 
C16 0.030(3) 0.035(4) 0.068(5) -0.001(3) -0.010(3) -0.012(3) 
C17 0.026(3) 0.036(3) 0.045(4) 0.003(3) 0.000(3) -0.014(3) 
C18 0.035(3) 0.026(3) 0.035(3) 0.004(2) -0.012(3) -0.017(3) 
C19 0.037(3) 0.034(3) 0.032(3) 0.009(2) -0.008(3) -0.019(3) 
C20 0.089(7) 0.047(4) 0.050(4) 0.016(3) -0.015(4) -0.043(5) 
C21 0.066(5) 0.052(5) 0.053(4) 0.012(4) -0.024(4) -0.039(4) 
C22 0.051(4) 0.035(4) 0.049(4) 0.008(3) -0.002(3) -0.023(3) 
C23 0.143(11) 0.074(7) 0.086(7) 0.019(6) -0.058(8) -0.080(8) 
C24A 0.105(19) 0.047(11) 0.051(11) 0.012(8) 0.004(11) -0.042(12) 
C24B 0.057(10) 0.067(11) 0.117(16) 0.027(10) -0.015(10) -0.048(9) 
C25 0.031(3) 0.033(3) 0.035(3) 0.004(2) -0.008(3) -0.016(3) 
C26 0.043(4) 0.032(3) 0.035(3) 0.001(2) -0.009(3) -0.022(3) 
C27 0.052(4) 0.039(4) 0.040(4) -0.005(3) -0.006(3) -0.020(3) 
C28 0.059(5) 0.033(4) 0.062(5) -0.003(3) -0.013(4) -0.019(4) 
C29 0.055(5) 0.035(4) 0.057(5) 0.013(3) -0.018(4) -0.025(4) 
C30 0.041(4) 0.043(4) 0.039(4) 0.013(3) -0.014(3) -0.025(3) 
C31 0.053(5) 0.066(5) 0.031(3) 0.012(3) -0.007(3) -0.039(4) 
C32 0.072(6) 0.094(7) 0.043(4) -0.012(4) 0.010(4) -0.055(6) 
C33 0.045(5) 0.101(8) 0.064(6) -0.017(5) -0.009(4) -0.035(5) 
C34 0.049(4) 0.039(4) 0.037(3) 0.000(3) 0.004(3) -0.024(3) 
C35 0.084(6) 0.038(4) 0.060(5) 0.019(4) -0.012(5) -0.035(4) 
C36 0.060(5) 0.041(4) 0.055(4) 0.011(3) -0.023(4) -0.024(4) 
C37 0.035(3) 0.030(3) 0.039(3) 0.003(2) -0.014(3) -0.016(3) 
C38 0.037(4) 0.034(3) 0.039(3) 0.001(3) -0.007(3) -0.015(3) 
C39 0.035(4) 0.044(4) 0.063(5) 0.004(3) -0.008(3) -0.017(3) 
C40 0.049(5) 0.052(5) 0.058(5) 0.003(4) -0.005(4) -0.028(4) 
C41 0.072(6) 0.046(4) 0.054(5) 0.013(3) -0.020(4) -0.035(4) 
C42 0.055(5) 0.030(3) 0.071(5) 0.001(3) -0.032(4) -0.022(3) 
C43 0.038(4) 0.035(3) 0.047(4) 0.004(3) -0.013(3) -0.014(3) 
C44 0.054(5) 0.053(5) 0.064(5) -0.012(4) -0.004(4) -0.009(4) 
C45 0.071(6) 0.044(5) 0.080(6) 0.015(4) -0.030(5) -0.005(4) 
C46 0.112(10) 0.033(5) 0.37(3) 0.038(9) -0.157(14) -0.034(6) 
C47 0.107(10) 0.091(9) 0.132(12) 0.044(8) -0.034(9) -0.053(8) 
C48 0.082(10) 0.045(7) 0.59(5) -0.026(14) -0.132(19) -0.016(7) 
O1S 0.104(6) 0.075(5) 0.089(5) 0.032(4) -0.043(5) -0.019(5) 
C1S 0.075(7) 0.052(6) 0.117(10) 0.000(6) -0.037(7) -0.017(5) 
C2S 0.079(8) 0.107(9) 0.087(8) -0.019(7) -0.006(6) -0.038(7) 
C3S 0.128(12) 0.057(6) 0.112(10) 0.020(6) -0.050(9) -0.026(7) 
C4S 0.133(14) 0.139(14) 0.127(13) 0.082(11) -0.045(11) -0.044(12) 
  
_geom_special_details 
; 
 All esds (except the esd in the dihedral angle between two l.s. planes) 
 are estimated using the full covariance matrix.  The cell esds are taken 
 into account individually in the estimation of esds in distances, angles 
 and torsion angles; correlations between esds in cell parameters are only 
 used when they are defined by crystal symmetry.  An approximate (isotropic) 
 treatment of cell esds is used for estimating esds involving l.s. planes. 
; 
  
loop_ 
 _geom_bond_atom_site_label_1 
 _geom_bond_atom_site_label_2 
 _geom_bond_distance 
 _geom_bond_site_symmetry_2 
 _geom_bond_publ_flag 
Bi1 O1 2.138(5) . ? 
Bi1 C1 2.285(6) . ? 
Bi1 C13 2.292(6) . ? 
Bi2 O2 2.171(5) . ? 
Bi2 C25 2.275(6) . ? 
Bi2 C37 2.305(7) . ? 
Bi2 O1 2.710(5) . ? 
O1 O2 1.515(7) . ? 
N1 C8 1.445(12) . ? 
N1 C9 1.450(11) . ? 
N1 C7 1.467(12) . ? 
N2 C12 1.451(10) . ? 
N2 C11 1.457(10) . ? 
N2 C10 1.478(10) . ? 
N3A C22 1.400(15) . ? 
N3A C24A 1.46(2) . ? 
N3A C23 1.478(17) . ? 
N3B C24B 1.488(17) . ? 
N4 C21 1.448(10) . ? 
N4 C20 1.459(9) . ? 
N4 C19 1.469(8) . ? 
N7 C46 1.336(11) . ? 
N7 C48 1.348(14) . ? 
N7 C47 1.517(14) . ? 
N8 C44 1.453(11) . ? 
N8 C45 1.467(10) . ? 
N8 C43 1.469(9) . ? 
N5 C33 1.445(10) . ? 
N5 C31 1.449(10) . ? 
N5 C32 1.472(9) . ? 
N6 C34 1.452(9) . ? 
N6 C36 1.459(10) . ? 
N6 C35 1.483(8) . ? 
C1 C6 1.382(10) . ? 
C1 C2 1.404(10) . ? 
C2 C3 1.401(11) . ? 
C2 C7 1.480(12) . ? 
C3 C4 1.345(15) . ? 
C4 C5 1.388(15) . ? 
C5 C6 1.414(10) . ? 
C6 C10 1.495(11) . ? 
C13 C18 1.411(8) . ? 
C13 C14 1.416(8) . ? 
C14 C15 1.389(9) . ? 
C14 C22 1.533(9) . ? 
C15 C16 1.379(10) . ? 
C16 C17 1.386(10) . ? 
C17 C18 1.378(9) . ? 
C18 C19 1.515(8) . ? 
C25 C26 1.386(9) . ? 
C25 C30 1.417(9) . ? 
C26 C27 1.396(9) . ? 
C26 C34 1.511(9) . ? 
C27 C28 1.365(11) . ? 
C28 C29 1.377(11) . ? 
C29 C30 1.387(10) . ? 
C30 C31 1.505(9) . ? 
C37 C42 1.389(9) . ? 
C37 C38 1.398(9) . ? 
C38 C39 1.393(10) . ? 
C38 C43 1.512(9) . ? 
C39 C40 1.367(11) . ? 
C40 C41 1.366(12) . ? 
C41 C42 1.389(11) . ? 
C42 C46 1.489(13) . ? 
O1S C1S 1.392(14) . ? 
O1S C3S 1.424(13) . ? 
C1S C2S 1.451(15) . ? 
C3S C4S 1.429(18) . ? 
  
loop_ 
 _geom_angle_atom_site_label_1 
 _geom_angle_atom_site_label_2 
 _geom_angle_atom_site_label_3 
 _geom_angle 
 _geom_angle_site_symmetry_1 
 _geom_angle_site_symmetry_3 
 _geom_angle_publ_flag 
O1 Bi1 C1 92.0(2) . . ? 
O1 Bi1 C13 88.0(2) . . ? 
C1 Bi1 C13 101.3(2) . . ? 
O2 Bi2 C25 98.2(2) . . ? 
O2 Bi2 C37 87.1(2) . . ? 
C25 Bi2 C37 98.2(2) . . ? 
O2 Bi2 O1 33.93(16) . . ? 
C25 Bi2 O1 132.10(19) . . ? 
C37 Bi2 O1 81.97(19) . . ? 
O2 O1 Bi1 99.5(3) . . ? 
O2 O1 Bi2 53.1(2) . . ? 
Bi1 O1 Bi2 149.6(2) . . ? 
O1 O2 Bi2 93.0(3) . . ? 
C8 N1 C9 111.1(8) . . ? 
C8 N1 C7 111.0(8) . . ? 
C9 N1 C7 109.8(8) . . ? 
C12 N2 C11 109.9(7) . . ? 
C12 N2 C10 111.7(7) . . ? 
C11 N2 C10 108.7(7) . . ? 
C22 N3A C24A 113.5(13) . . ? 
C22 N3A C23 112.0(11) . . ? 
C24A N3A C23 111.5(15) . . ? 
C21 N4 C20 108.7(6) . . ? 
C21 N4 C19 111.7(5) . . ? 
C20 N4 C19 109.5(6) . . ? 
C46 N7 C48 126.3(11) . . ? 
C46 N7 C47 101.1(11) . . ? 
C48 N7 C47 95.3(12) . . ? 
C44 N8 C45 109.8(7) . . ? 
C44 N8 C43 109.5(6) . . ? 
C45 N8 C43 108.6(7) . . ? 
C33 N5 C31 113.0(7) . . ? 
C33 N5 C32 110.7(7) . . ? 
C31 N5 C32 107.9(7) . . ? 
C34 N6 C36 112.6(6) . . ? 
C34 N6 C35 107.9(6) . . ? 
C36 N6 C35 109.7(6) . . ? 
C6 C1 C2 120.1(7) . . ? 
C6 C1 Bi1 119.8(5) . . ? 
C2 C1 Bi1 120.0(5) . . ? 
C3 C2 C1 118.4(8) . . ? 
C3 C2 C7 119.1(8) . . ? 
C1 C2 C7 122.3(7) . . ? 
C4 C3 C2 122.1(9) . . ? 
C3 C4 C5 119.9(8) . . ? 
C4 C5 C6 119.8(9) . . ? 
C1 C6 C5 119.5(8) . . ? 
C1 C6 C10 120.7(6) . . ? 
C5 C6 C10 119.8(8) . . ? 
N1 C7 C2 111.1(6) . . ? 
N2 C10 C6 112.7(7) . . ? 
C18 C13 C14 118.4(6) . . ? 
C18 C13 Bi1 124.8(4) . . ? 
C14 C13 Bi1 116.1(4) . . ? 
C15 C14 C13 120.0(6) . . ? 
C15 C14 C22 116.5(6) . . ? 
C13 C14 C22 123.5(6) . . ? 
C16 C15 C14 120.7(6) . . ? 
C15 C16 C17 119.6(6) . . ? 
C18 C17 C16 121.3(6) . . ? 
C17 C18 C13 120.0(6) . . ? 
C17 C18 C19 117.3(6) . . ? 
C13 C18 C19 122.6(6) . . ? 
N4 C19 C18 113.0(5) . . ? 
N3A C22 C14 113.5(8) . . ? 
C26 C25 C30 118.4(6) . . ? 
C26 C25 Bi2 120.3(4) . . ? 
C30 C25 Bi2 121.1(5) . . ? 
C25 C26 C27 120.5(6) . . ? 
C25 C26 C34 119.9(6) . . ? 
C27 C26 C34 119.6(6) . . ? 
C28 C27 C26 120.4(7) . . ? 
C27 C28 C29 120.3(7) . . ? 
C28 C29 C30 120.5(7) . . ? 
C29 C30 C25 119.7(6) . . ? 
C29 C30 C31 120.7(6) . . ? 
C25 C30 C31 119.7(6) . . ? 
N5 C31 C30 111.6(6) . . ? 
N6 C34 C26 111.2(5) . . ? 
C42 C37 C38 119.6(6) . . ? 
C42 C37 Bi2 116.9(5) . . ? 
C38 C37 Bi2 123.3(5) . . ? 
C39 C38 C37 118.5(6) . . ? 
C39 C38 C43 117.9(6) . . ? 
C37 C38 C43 123.2(6) . . ? 
C40 C39 C38 121.5(7) . . ? 
C41 C40 C39 119.7(8) . . ? 
C40 C41 C42 120.6(7) . . ? 
C37 C42 C41 119.8(7) . . ? 
C37 C42 C46 120.4(8) . . ? 
C41 C42 C46 119.3(8) . . ? 
N8 C43 C38 112.6(6) . . ? 
N7 C46 C42 122.4(10) . . ? 
C1S O1S C3S 113.2(10) . . ? 
O1S C1S C2S 109.4(9) . . ? 
O1S C3S C4S 110.1(11) . . ? 
  
loop_ 
 _geom_torsion_atom_site_label_1 
 _geom_torsion_atom_site_label_2 
 _geom_torsion_atom_site_label_3 
 _geom_torsion_atom_site_label_4 
 _geom_torsion 
 _geom_torsion_site_symmetry_1 
 _geom_torsion_site_symmetry_2 
 _geom_torsion_site_symmetry_3 
 _geom_torsion_site_symmetry_4 
 _geom_torsion_publ_flag 
C1 Bi1 O1 O2 173.1(4) . . . . ? 
C13 Bi1 O1 O2 71.8(3) . . . . ? 
C1 Bi1 O1 Bi2 -163.6(5) . . . . ? 
C13 Bi1 O1 Bi2 95.2(5) . . . . ? 
C25 Bi2 O1 O2 -2.9(4) . . . . ? 
C37 Bi2 O1 O2 -96.8(3) . . . . ? 
O2 Bi2 O1 Bi1 -29.3(4) . . . . ? 
C25 Bi2 O1 Bi1 -32.2(6) . . . . ? 
C37 Bi2 O1 Bi1 -126.0(5) . . . . ? 
Bi1 O1 O2 Bi2 165.5(2) . . . . ? 
C25 Bi2 O2 O1 177.9(3) . . . . ? 
C37 Bi2 O2 O1 79.9(3) . . . . ? 
O1 Bi1 C1 C6 -141.9(5) . . . . ? 
C13 Bi1 C1 C6 -53.6(6) . . . . ? 
O1 Bi1 C1 C2 40.7(5) . . . . ? 
C13 Bi1 C1 C2 129.0(5) . . . . ? 
C6 C1 C2 C3 4.0(11) . . . . ? 
Bi1 C1 C2 C3 -178.7(6) . . . . ? 
C6 C1 C2 C7 -170.7(7) . . . . ? 
Bi1 C1 C2 C7 6.7(9) . . . . ? 
C1 C2 C3 C4 0.0(13) . . . . ? 
C7 C2 C3 C4 174.8(9) . . . . ? 
C2 C3 C4 C5 -5.2(15) . . . . ? 
C3 C4 C5 C6 6.5(14) . . . . ? 
C2 C1 C6 C5 -2.7(11) . . . . ? 
Bi1 C1 C6 C5 180.0(6) . . . . ? 
C2 C1 C6 C10 176.5(7) . . . . ? 
Bi1 C1 C6 C10 -0.9(9) . . . . ? 
C4 C5 C6 C1 -2.5(12) . . . . ? 
C4 C5 C6 C10 178.3(8) . . . . ? 
C8 N1 C7 C2 -171.7(7) . . . . ? 
C9 N1 C7 C2 65.2(8) . . . . ? 
C3 C2 C7 N1 -124.9(8) . . . . ? 
C1 C2 C7 N1 49.7(9) . . . . ? 
C12 N2 C10 C6 -62.5(8) . . . . ? 
C11 N2 C10 C6 176.0(6) . . . . ? 
C1 C6 C10 N2 -41.6(10) . . . . ? 
C5 C6 C10 N2 137.5(7) . . . . ? 
O1 Bi1 C13 C18 47.1(5) . . . . ? 
C1 Bi1 C13 C18 -44.6(6) . . . . ? 
O1 Bi1 C13 C14 -123.3(5) . . . . ? 
C1 Bi1 C13 C14 145.0(5) . . . . ? 
C18 C13 C14 C15 0.6(10) . . . . ? 
Bi1 C13 C14 C15 171.6(5) . . . . ? 
C18 C13 C14 C22 179.7(6) . . . . ? 
Bi1 C13 C14 C22 -9.2(9) . . . . ? 
C13 C14 C15 C16 -0.6(11) . . . . ? 
C22 C14 C15 C16 -179.8(7) . . . . ? 
C14 C15 C16 C17 0.0(12) . . . . ? 
C15 C16 C17 C18 0.6(11) . . . . ? 
C16 C17 C18 C13 -0.6(10) . . . . ? 
C16 C17 C18 C19 -176.2(7) . . . . ? 
C14 C13 C18 C17 0.0(9) . . . . ? 
Bi1 C13 C18 C17 -170.2(5) . . . . ? 
C14 C13 C18 C19 175.3(6) . . . . ? 
Bi1 C13 C18 C19 5.1(9) . . . . ? 
C21 N4 C19 C18 -69.4(7) . . . . ? 
C20 N4 C19 C18 170.1(6) . . . . ? 
C17 C18 C19 N4 -41.2(8) . . . . ? 
C13 C18 C19 N4 143.4(6) . . . . ? 
C24A N3A C22 C14 167.7(14) . . . . ? 
C23 N3A C22 C14 -64.9(14) . . . . ? 
C15 C14 C22 N3A -47.6(12) . . . . ? 
C13 C14 C22 N3A 133.3(10) . . . . ? 
O2 Bi2 C25 C26 -146.2(5) . . . . ? 
C37 Bi2 C25 C26 -58.0(6) . . . . ? 
O1 Bi2 C25 C26 -144.6(5) . . . . ? 
O2 Bi2 C25 C30 39.6(6) . . . . ? 
C37 Bi2 C25 C30 127.8(5) . . . . ? 
O1 Bi2 C25 C30 41.2(6) . . . . ? 
C30 C25 C26 C27 -5.3(10) . . . . ? 
Bi2 C25 C26 C27 -179.7(5) . . . . ? 
C30 C25 C26 C34 176.3(6) . . . . ? 
Bi2 C25 C26 C34 1.9(9) . . . . ? 
C25 C26 C27 C28 2.2(12) . . . . ? 
C34 C26 C27 C28 -179.3(7) . . . . ? 
C26 C27 C28 C29 0.1(13) . . . . ? 
C27 C28 C29 C30 0.9(13) . . . . ? 
C28 C29 C30 C25 -4.0(12) . . . . ? 
C28 C29 C30 C31 176.7(7) . . . . ? 
C26 C25 C30 C29 6.1(10) . . . . ? 
Bi2 C25 C30 C29 -179.5(5) . . . . ? 
C26 C25 C30 C31 -174.6(6) . . . . ? 
Bi2 C25 C30 C31 -0.2(9) . . . . ? 
C33 N5 C31 C30 63.3(9) . . . . ? 
C32 N5 C31 C30 -174.1(7) . . . . ? 
C29 C30 C31 N5 -128.3(8) . . . . ? 
C25 C30 C31 N5 52.4(9) . . . . ? 
C36 N6 C34 C26 -62.7(8) . . . . ? 
C35 N6 C34 C26 176.2(6) . . . . ? 
C25 C26 C34 N6 -43.6(9) . . . . ? 
C27 C26 C34 N6 138.0(7) . . . . ? 
O2 Bi2 C37 C42 -120.7(6) . . . . ? 
C25 Bi2 C37 C42 141.4(5) . . . . ? 
O1 Bi2 C37 C42 -87.0(5) . . . . ? 
O2 Bi2 C37 C38 53.5(6) . . . . ? 
C25 Bi2 C37 C38 -44.3(6) . . . . ? 
O1 Bi2 C37 C38 87.2(5) . . . . ? 
C42 C37 C38 C39 -4.7(10) . . . . ? 
Bi2 C37 C38 C39 -178.7(5) . . . . ? 
C42 C37 C38 C43 168.5(7) . . . . ? 
Bi2 C37 C38 C43 -5.5(9) . . . . ? 
C37 C38 C39 C40 0.5(12) . . . . ? 
C43 C38 C39 C40 -173.1(7) . . . . ? 
C38 C39 C40 C41 3.1(13) . . . . ? 
C39 C40 C41 C42 -2.6(13) . . . . ? 
C38 C37 C42 C41 5.2(11) . . . . ? 
Bi2 C37 C42 C41 179.7(6) . . . . ? 
C38 C37 C42 C46 -166.9(10) . . . . ? 
Bi2 C37 C42 C46 7.5(12) . . . . ? 
C40 C41 C42 C37 -1.6(12) . . . . ? 
C40 C41 C42 C46 170.6(11) . . . . ? 
C44 N8 C43 C38 -72.8(8) . . . . ? 
C45 N8 C43 C38 167.3(7) . . . . ? 
C39 C38 C43 N8 -35.0(9) . . . . ? 
C37 C38 C43 N8 151.8(7) . . . . ? 
C48 N7 C46 C42 -160.5(17) . . . . ? 
C47 N7 C46 C42 94.3(17) . . . . ? 
C37 C42 C46 N7 163.5(13) . . . . ? 
C41 C42 C46 N7 -9(2) . . . . ? 
C3S O1S C1S C2S -177.2(10) . . . . ? 
C1S O1S C3S C4S -171.2(13) . . . . ? 
  
_diffrn_measured_fraction_theta_max    0.988 
_diffrn_reflns_theta_full              27.50 
_diffrn_measured_fraction_theta_full   0.988 
_refine_diff_density_max    2.095 
_refine_diff_density_min   -2.304 
_refine_diff_density_rms    0.146 

_eof  # End of Crystallographic Information File
